# Supplementary material
Source: publisher figshare collection journal article supplement (https://gsajournals.figshare.com/ndownloader/files/14331776)
Supplement: Supplementary file 1 [file 14331776]

## Sheet: lincRNAs
Supplementary File S8. Results of QTL analysis.
Chr	St	End	Strand	lincRNA	Chr	St_QTL	End_QTL	QTL_ID	Type	QTL interval	Left_Gene_to_lincRNA	Right_Gene_to_lincRNA
9	93793209	93797530	-	MSTRG.26756	9	93460494	93799321	127008	Tail fat deposition	338827	DSCC1	-
25	7612489	7615461	-	MSTRG.17595	25	7202582	7694641	127015	Tail fat deposition	492059	-	TOMM20
13	63356541	63371778	+	MSTRG.6399	13	62767123	63461553	127012	Tail fat deposition	694430	-	ITCH
18	58748779	58750175	-	MSTRG.10830	18	55992215	58992071	14326	Carcass fat percentage	2999856	DICER1	CLMN
10	28841431	28846038	-	MSTRG.2930	10	26820350	32294189	126989	Tail fat deposition	5473839	-	N4BP2L1
10	30330057	30332096	+	MSTRG.2940	10	26820350	32294189	126989	Tail fat deposition	5473839	MEDAG	ALOX5AP
3	38182529	38199498	+	MSTRG.18895	3	37167143	43070322	126987	Tail fat deposition	5903179	PCBP1	ASPRV1
6	7044044	7045071	-	MSTRG.23423	6	1612537	12720529	14257	Carcass fat percentage	11107992	PRSS12	NDST3
16	23676157	23679896	+	MSTRG.9146	16	22239840	40488019	14273	Subcutaneous fat area	18248179	SLC38A9	PLPP1
1	182647359	182647931	-	MSTRG.1808	1	168602638	197308986	14251	Carcass fat percentage	28706348	CD80	ADPRH
1	186108843	186113440	+	MSTRG.1877	1	168602638	197308986	14251	Carcass fat percentage	28706348	ADCY5	HACD2
1	188856697	188857705	+	MSTRG.1914	1	168602638	197308986	14251	Carcass fat percentage	28706348	-	-
1	190255340	190257907	+	MSTRG.1951	1	168602638	197308986	14251	Carcass fat percentage	28706348	BDH1	APOD
1	191753121	191755595	+	MSTRG.1974	1	168602638	197308986	14251	Carcass fat percentage	28706348	HES1	OPA1
21	8836580	8837552	-	MSTRG.14875	21	8498873	50073674	17201	Meat myristic acid content	41574801	EED	PICALM
21	21187415	21199076	-	MSTRG.14965	21	8498873	50073674	17201	Meat myristic acid content	41574801	LUZP2	SVIP
21	28476758	28484374	-	MSTRG.15031	21	8498873	50073674	17201	Meat myristic acid content	41574801	-	PUS3
21	28771484	28772063	+	MSTRG.15036	21	8498873	50073674	17201	Meat myristic acid content	41574801	CDON	RPUSD4
21	36586235	36592518	+	MSTRG.15088	21	8498873	50073674	17201	Meat myristic acid content	41574801	CD6	CD5
21	40197793	40206002	-	MSTRG.15216	21	8498873	50073674	17201	Meat myristic acid content	41574801	SCGB1A1	AHNAK
21	41462267	41472156	-	MSTRG.15168	21	8498873	50073674	17201	Meat myristic acid content	41574801	-	C11orf84
21	43280214	43281117	-	MSTRG.15310	21	8498873	50073674	17201	Meat myristic acid content	41574801	CFL1	MUS81
21	4554382	4571238	-	MSTRG.14834	21	4519511	49999253	17212	Meat arachidonic acid content	45479742	-	CHORDC1
21	8836580	8837552	-	MSTRG.14875	21	4519511	49999253	17212	Meat arachidonic acid content	45479742	EED	PICALM
21	21187415	21199076	-	MSTRG.14965	21	4519511	49999253	17212	Meat arachidonic acid content	45479742	LUZP2	SVIP
21	28476758	28484374	-	MSTRG.15031	21	4519511	49999253	17212	Meat arachidonic acid content	45479742	-	PUS3
21	28771484	28772063	+	MSTRG.15036	21	4519511	49999253	17212	Meat arachidonic acid content	45479742	CDON	RPUSD4
21	36586235	36592518	+	MSTRG.15088	21	4519511	49999253	17212	Meat arachidonic acid content	45479742	CD6	CD5
21	40197793	40206002	-	MSTRG.15216	21	4519511	49999253	17212	Meat arachidonic acid content	45479742	SCGB1A1	AHNAK
21	41462267	41472156	-	MSTRG.15168	21	4519511	49999253	17212	Meat arachidonic acid content	45479742	-	C11orf84
21	43280214	43281117	-	MSTRG.15310	21	4519511	49999253	17212	Meat arachidonic acid content	45479742	CFL1	MUS81
21	4554382	4571238	-	MSTRG.14834	21	4519511	50073674	17218	Meat docosapentaenoic acid content	45554163	-	CHORDC1
21	4554382	4571238	-	MSTRG.14834	21	4519511	50073674	17207	Meat gadoleic acid content	45554163	-	CHORDC1
21	4554382	4571238	-	MSTRG.14834	21	4519511	50073674	17202	Meat palmitic acid content	45554163	-	CHORDC1
21	4554382	4571238	-	MSTRG.14834	21	4519511	50073674	17211	Meat linolenic acid content	45554163	-	CHORDC1
21	4554382	4571238	-	MSTRG.14834	21	4519511	50073674	17203	Meat stearic acid content	45554163	-	CHORDC1
21	4554382	4571238	-	MSTRG.14834	21	4519511	50073674	17205	Meat oleic acid content	45554163	-	CHORDC1
21	4554382	4571238	-	MSTRG.14834	21	4519511	50073674	17206	Meat cis-vaccenic acid content	45554163	-	CHORDC1
21	4554382	4571238	-	MSTRG.14834	21	4519511	50073674	17209	Meat linoleic acid content	45554163	-	CHORDC1
21	8836580	8837552	-	MSTRG.14875	21	4519511	50073674	17218	Meat docosapentaenoic acid content	45554163	EED	PICALM
21	8836580	8837552	-	MSTRG.14875	21	4519511	50073674	17207	Meat gadoleic acid content	45554163	EED	PICALM
21	8836580	8837552	-	MSTRG.14875	21	4519511	50073674	17202	Meat palmitic acid content	45554163	EED	PICALM
21	8836580	8837552	-	MSTRG.14875	21	4519511	50073674	17211	Meat linolenic acid content	45554163	EED	PICALM
21	8836580	8837552	-	MSTRG.14875	21	4519511	50073674	17203	Meat stearic acid content	45554163	EED	PICALM
21	8836580	8837552	-	MSTRG.14875	21	4519511	50073674	17205	Meat oleic acid content	45554163	EED	PICALM
21	8836580	8837552	-	MSTRG.14875	21	4519511	50073674	17206	Meat cis-vaccenic acid content	45554163	EED	PICALM
21	8836580	8837552	-	MSTRG.14875	21	4519511	50073674	17209	Meat linoleic acid content	45554163	EED	PICALM
21	21187415	21199076	-	MSTRG.14965	21	4519511	50073674	17218	Meat docosapentaenoic acid content	45554163	LUZP2	SVIP
21	21187415	21199076	-	MSTRG.14965	21	4519511	50073674	17207	Meat gadoleic acid content	45554163	LUZP2	SVIP
21	21187415	21199076	-	MSTRG.14965	21	4519511	50073674	17202	Meat palmitic acid content	45554163	LUZP2	SVIP
21	21187415	21199076	-	MSTRG.14965	21	4519511	50073674	17211	Meat linolenic acid content	45554163	LUZP2	SVIP
21	21187415	21199076	-	MSTRG.14965	21	4519511	50073674	17203	Meat stearic acid content	45554163	LUZP2	SVIP
21	21187415	21199076	-	MSTRG.14965	21	4519511	50073674	17205	Meat oleic acid content	45554163	LUZP2	SVIP
21	21187415	21199076	-	MSTRG.14965	21	4519511	50073674	17206	Meat cis-vaccenic acid content	45554163	LUZP2	SVIP
21	21187415	21199076	-	MSTRG.14965	21	4519511	50073674	17209	Meat linoleic acid content	45554163	LUZP2	SVIP
21	28476758	28484374	-	MSTRG.15031	21	4519511	50073674	17218	Meat docosapentaenoic acid content	45554163	-	PUS3
21	28476758	28484374	-	MSTRG.15031	21	4519511	50073674	17207	Meat gadoleic acid content	45554163	-	PUS3
21	28476758	28484374	-	MSTRG.15031	21	4519511	50073674	17202	Meat palmitic acid content	45554163	-	PUS3
21	28476758	28484374	-	MSTRG.15031	21	4519511	50073674	17211	Meat linolenic acid content	45554163	-	PUS3
21	28476758	28484374	-	MSTRG.15031	21	4519511	50073674	17203	Meat stearic acid content	45554163	-	PUS3
21	28476758	28484374	-	MSTRG.15031	21	4519511	50073674	17205	Meat oleic acid content	45554163	-	PUS3
21	28476758	28484374	-	MSTRG.15031	21	4519511	50073674	17206	Meat cis-vaccenic acid content	45554163	-	PUS3
21	28476758	28484374	-	MSTRG.15031	21	4519511	50073674	17209	Meat linoleic acid content	45554163	-	PUS3
21	28771484	28772063	+	MSTRG.15036	21	4519511	50073674	17218	Meat docosapentaenoic acid content	45554163	CDON	RPUSD4
21	28771484	28772063	+	MSTRG.15036	21	4519511	50073674	17207	Meat gadoleic acid content	45554163	CDON	RPUSD4
21	28771484	28772063	+	MSTRG.15036	21	4519511	50073674	17202	Meat palmitic acid content	45554163	CDON	RPUSD4
21	28771484	28772063	+	MSTRG.15036	21	4519511	50073674	17211	Meat linolenic acid content	45554163	CDON	RPUSD4
21	28771484	28772063	+	MSTRG.15036	21	4519511	50073674	17203	Meat stearic acid content	45554163	CDON	RPUSD4
21	28771484	28772063	+	MSTRG.15036	21	4519511	50073674	17205	Meat oleic acid content	45554163	CDON	RPUSD4
21	28771484	28772063	+	MSTRG.15036	21	4519511	50073674	17206	Meat cis-vaccenic acid content	45554163	CDON	RPUSD4
21	28771484	28772063	+	MSTRG.15036	21	4519511	50073674	17209	Meat linoleic acid content	45554163	CDON	RPUSD4
21	36586235	36592518	+	MSTRG.15088	21	4519511	50073674	17218	Meat docosapentaenoic acid content	45554163	CD6	CD5
21	36586235	36592518	+	MSTRG.15088	21	4519511	50073674	17207	Meat gadoleic acid content	45554163	CD6	CD5
21	36586235	36592518	+	MSTRG.15088	21	4519511	50073674	17202	Meat palmitic acid content	45554163	CD6	CD5
21	36586235	36592518	+	MSTRG.15088	21	4519511	50073674	17211	Meat linolenic acid content	45554163	CD6	CD5
21	36586235	36592518	+	MSTRG.15088	21	4519511	50073674	17203	Meat stearic acid content	45554163	CD6	CD5
21	36586235	36592518	+	MSTRG.15088	21	4519511	50073674	17205	Meat oleic acid content	45554163	CD6	CD5
21	36586235	36592518	+	MSTRG.15088	21	4519511	50073674	17206	Meat cis-vaccenic acid content	45554163	CD6	CD5
21	36586235	36592518	+	MSTRG.15088	21	4519511	50073674	17209	Meat linoleic acid content	45554163	CD6	CD5
21	40197793	40206002	-	MSTRG.15216	21	4519511	50073674	17218	Meat docosapentaenoic acid content	45554163	SCGB1A1	AHNAK
21	40197793	40206002	-	MSTRG.15216	21	4519511	50073674	17207	Meat gadoleic acid content	45554163	SCGB1A1	AHNAK
21	40197793	40206002	-	MSTRG.15216	21	4519511	50073674	17202	Meat palmitic acid content	45554163	SCGB1A1	AHNAK
21	40197793	40206002	-	MSTRG.15216	21	4519511	50073674	17211	Meat linolenic acid content	45554163	SCGB1A1	AHNAK
21	40197793	40206002	-	MSTRG.15216	21	4519511	50073674	17203	Meat stearic acid content	45554163	SCGB1A1	AHNAK
21	40197793	40206002	-	MSTRG.15216	21	4519511	50073674	17205	Meat oleic acid content	45554163	SCGB1A1	AHNAK
21	40197793	40206002	-	MSTRG.15216	21	4519511	50073674	17206	Meat cis-vaccenic acid content	45554163	SCGB1A1	AHNAK
21	40197793	40206002	-	MSTRG.15216	21	4519511	50073674	17209	Meat linoleic acid content	45554163	SCGB1A1	AHNAK
21	41462267	41472156	-	MSTRG.15168	21	4519511	50073674	17218	Meat docosapentaenoic acid content	45554163	-	C11orf84
21	41462267	41472156	-	MSTRG.15168	21	4519511	50073674	17207	Meat gadoleic acid content	45554163	-	C11orf84
21	41462267	41472156	-	MSTRG.15168	21	4519511	50073674	17202	Meat palmitic acid content	45554163	-	C11orf84
21	41462267	41472156	-	MSTRG.15168	21	4519511	50073674	17211	Meat linolenic acid content	45554163	-	C11orf84
21	41462267	41472156	-	MSTRG.15168	21	4519511	50073674	17203	Meat stearic acid content	45554163	-	C11orf84
21	41462267	41472156	-	MSTRG.15168	21	4519511	50073674	17205	Meat oleic acid content	45554163	-	C11orf84
21	41462267	41472156	-	MSTRG.15168	21	4519511	50073674	17206	Meat cis-vaccenic acid content	45554163	-	C11orf84
21	41462267	41472156	-	MSTRG.15168	21	4519511	50073674	17209	Meat linoleic acid content	45554163	-	C11orf84
21	43280214	43281117	-	MSTRG.15310	21	4519511	50073674	17218	Meat docosapentaenoic acid content	45554163	CFL1	MUS81
21	43280214	43281117	-	MSTRG.15310	21	4519511	50073674	17207	Meat gadoleic acid content	45554163	CFL1	MUS81
21	43280214	43281117	-	MSTRG.15310	21	4519511	50073674	17202	Meat palmitic acid content	45554163	CFL1	MUS81
21	43280214	43281117	-	MSTRG.15310	21	4519511	50073674	17211	Meat linolenic acid content	45554163	CFL1	MUS81
21	43280214	43281117	-	MSTRG.15310	21	4519511	50073674	17203	Meat stearic acid content	45554163	CFL1	MUS81
21	43280214	43281117	-	MSTRG.15310	21	4519511	50073674	17205	Meat oleic acid content	45554163	CFL1	MUS81
21	43280214	43281117	-	MSTRG.15310	21	4519511	50073674	17206	Meat cis-vaccenic acid content	45554163	CFL1	MUS81
21	43280214	43281117	-	MSTRG.15310	21	4519511	50073674	17209	Meat linoleic acid content	45554163	CFL1	MUS81
18	13323121	13336841	-	MSTRG.10367	18	10964106	62018008	17208	Meat gadoleic acid content	51053902	CHD2	FAM174B
18	13323121	13336841	-	MSTRG.10367	18	12038572	63092474	17219	Meat docosahexaenoic acid content	51053902	CHD2	FAM174B
18	21396876	21398162	+	MSTRG.10436	18	10964106	62018008	17208	Meat gadoleic acid content	51053902	ZSCAN2	WDR73
18	21396876	21398162	+	MSTRG.10436	18	12038572	63092474	17219	Meat docosahexaenoic acid content	51053902	ZSCAN2	WDR73
18	26766082	26799456	+	MSTRG.10510	18	10964106	62018008	17208	Meat gadoleic acid content	51053902	-	APBA2
18	26766082	26799456	+	MSTRG.10510	18	12038572	63092474	17219	Meat docosahexaenoic acid content	51053902	-	APBA2
18	29358492	29367209	-	MSTRG.10527	18	10964106	62018008	17208	Meat gadoleic acid content	51053902	OTUD7A	ADAMTS7
18	29358492	29367209	-	MSTRG.10527	18	12038572	63092474	17219	Meat docosahexaenoic acid content	51053902	OTUD7A	ADAMTS7
18	29701930	29703982	-	MSTRG.10536	18	10964106	62018008	17208	Meat gadoleic acid content	51053902	ACSBG1	DNAJA4
18	29701930	29703982	-	MSTRG.10536	18	12038572	63092474	17219	Meat docosahexaenoic acid content	51053902	ACSBG1	DNAJA4
18	58748779	58750175	-	MSTRG.10830	18	10964106	62018008	17208	Meat gadoleic acid content	51053902	DICER1	CLMN
18	58748779	58750175	-	MSTRG.10830	18	12038572	63092474	17219	Meat docosahexaenoic acid content	51053902	DICER1	CLMN
23	3337737	3344464	-	MSTRG.16164	23	1308282	55439735	14313	Carcass fat percentage	54131453	-	TSHZ1
23	11083557	11086892	-	MSTRG.16215	23	1308282	55439735	14313	Carcass fat percentage	54131453	CDH7	SERPINB8
23	39338600	39341725	+	MSTRG.16390	23	1308282	55439735	14313	Carcass fat percentage	54131453	EPB41L3	-
23	45554025	45560416	-	MSTRG.16443	23	1308282	55439735	14313	Carcass fat percentage	54131453	SETBP1	SLC14A2
16	23676157	23679896	+	MSTRG.9146	16	4469249	60232331	14308	Subcutaneous fat area	55763082	SLC38A9	PLPP1
16	23676157	23679896	+	MSTRG.9146	16	4469249	62748762	14309	Subcutaneous fat thickness	58279513	SLC38A9	PLPP1
10	19887752	19889484	+	MSTRG.2867	10	13900918	78598103	14294	Carcass fat percentage	64697185	KCNRG	DLEU7
10	22386203	22386969	+	MSTRG.2890	10	13900918	78598103	14294	Carcass fat percentage	64697185	FOXO1	-
10	28841431	28846038	-	MSTRG.2930	10	13900918	78598103	14294	Carcass fat percentage	64697185	-	N4BP2L1
10	30330057	30332096	+	MSTRG.2940	10	13900918	78598103	14294	Carcass fat percentage	64697185	MEDAG	ALOX5AP
10	40413095	40555874	+	MSTRG.3060	10	13900918	78598103	14294	Carcass fat percentage	64697185	-	PCDH9
10	50101923	50137692	-	MSTRG.3081	10	13900918	78598103	14294	Carcass fat percentage	64697185	KLF12	-
10	55927305	56075230	+	MSTRG.3110	10	13900918	78598103	14294	Carcass fat percentage	64697185	SPRY2	-
10	66185553	66186737	-	MSTRG.3133	10	13900918	78598103	14294	Carcass fat percentage	64697185	-	GPC5
10	75354937	75356690	+	MSTRG.3173	10	13900918	78598103	14294	Carcass fat percentage	64697185	DOCK9	UBAC2
1	90216383	90216945	+	MSTRG.972	1	78279499	143728559	14239	Backfat at third lumbar	65449060	PHTF1	RSBN1
1	103670488	103672016	-	MSTRG.1240	1	78279499	143728559	14239	Backfat at third lumbar	65449060	KCNN3	PMVK
1	105050875	105052615	-	MSTRG.1316	1	78279499	143728559	14239	Backfat at third lumbar	65449060	MEF2D	IQGAP3
1	112878952	112880838	-	MSTRG.1456	1	78279499	143728559	14239	Backfat at third lumbar	65449060	-	RGS5
1	122023890	122024368	-	MSTRG.1552	1	78279499	143728559	14239	Backfat at third lumbar	65449060	HUNK	SCAF4
5	6151677	6152937	-	MSTRG.22144	5	2630671	91363350	17204	Meat palmitoleic acid content	88732679	-	-
5	11083543	11096546	+	MSTRG.22282	5	2630671	91363350	17204	Meat palmitoleic acid content	88732679	-	-
5	12281422	12287327	-	MSTRG.22314	5	2630671	91363350	17204	Meat palmitoleic acid content	88732679	RDH8	-
5	13083610	13085664	-	MSTRG.22365	5	2630671	91363350	17204	Meat palmitoleic acid content	88732679	-	SMARCA4
5	13651067	13661452	-	MSTRG.22393	5	2630671	91363350	17204	Meat palmitoleic acid content	88732679	-	-
5	19534522	19556107	-	MSTRG.22613	5	2630671	91363350	17204	Meat palmitoleic acid content	88732679	IRF1	SLC22A5
5	50842642	50863674	+	MSTRG.23034	5	2630671	91363350	17204	Meat palmitoleic acid content	88732679	NDFIP1	FGF1
5	69270805	69282931	+	MSTRG.23190	5	2630671	91363350	17204	Meat palmitoleic acid content	88732679	C1QTNF2	ZBED8
5	69292018	69300090	+	MSTRG.23192	5	2630671	91363350	17204	Meat palmitoleic acid content	88732679	C1QTNF2	ZBED8
3	69888414	70011998	-	MSTRG.19140	3	49221453	156721993	17220	Meat conjugated linoleic acid content	107500540	-	PSME4
3	76230783	76238653	+	MSTRG.19154	3	49221453	156721993	17220	Meat conjugated linoleic acid content	107500540	FOXN2	-
3	81857339	81860123	-	MSTRG.19225	3	49221453	156721993	17220	Meat conjugated linoleic acid content	107500540	EML4	PKDCC
3	100257138	100261667	-	MSTRG.19405	3	49221453	156721993	17220	Meat conjugated linoleic acid content	107500540	CNOT11	TBC1D8
3	100939679	100946632	+	MSTRG.19416	3	49221453	156721993	17220	Meat conjugated linoleic acid content	107500540	LONRF2	-
3	105540419	105603909	-	MSTRG.19492	3	49221453	156721993	17220	Meat conjugated linoleic acid content	107500540	BCL2L11	-
3	125603809	125615218	+	MSTRG.19585	3	49221453	156721993	17220	Meat conjugated linoleic acid content	107500540	DUSP6	POC1B
3	127494202	127519967	-	MSTRG.19607	3	49221453	156721993	17220	Meat conjugated linoleic acid content	107500540	DCN	-
3	139446489	139488809	-	MSTRG.19855	3	49221453	156721993	17220	Meat conjugated linoleic acid content	107500540	AMIGO2	SLC38A4
3	142726356	142727126	+	MSTRG.19878	3	49221453	156721993	17220	Meat conjugated linoleic acid content	107500540	TWF1	IRAK4
1	40237930	40260632	-	MSTRG.578	1	38333681	242147178	17215	Meat eicosapentaenoic acid content	203813497	JAK1	AK4
1	63765146	63772080	-	MSTRG.696	1	38333681	242147178	17215	Meat eicosapentaenoic acid content	203813497	-	LMO4
1	77644831	77657692	+	MSTRG.839	1	38333681	242147178	17215	Meat eicosapentaenoic acid content	203813497	DPH5	S1PR1
1	90216383	90216945	+	MSTRG.972	1	38333681	242147178	17215	Meat eicosapentaenoic acid content	203813497	PHTF1	RSBN1
1	103670488	103672016	-	MSTRG.1240	1	38333681	242147178	17215	Meat eicosapentaenoic acid content	203813497	KCNN3	PMVK
1	105050875	105052615	-	MSTRG.1316	1	38333681	242147178	17215	Meat eicosapentaenoic acid content	203813497	MEF2D	IQGAP3
1	112878952	112880838	-	MSTRG.1456	1	38333681	242147178	17215	Meat eicosapentaenoic acid content	203813497	-	RGS5
1	122023890	122024368	-	MSTRG.1552	1	38333681	242147178	17215	Meat eicosapentaenoic acid content	203813497	HUNK	SCAF4
1	154598497	154622329	+	MSTRG.1646	1	38333681	242147178	17215	Meat eicosapentaenoic acid content	203813497	HTR1F	CGGBP1
1	182647359	182647931	-	MSTRG.1808	1	38333681	242147178	17215	Meat eicosapentaenoic acid content	203813497	CD80	ADPRH
1	186108843	186113440	+	MSTRG.1877	1	38333681	242147178	17215	Meat eicosapentaenoic acid content	203813497	ADCY5	HACD2
1	188856697	188857705	+	MSTRG.1914	1	38333681	242147178	17215	Meat eicosapentaenoic acid content	203813497	-	-
1	190255340	190257907	+	MSTRG.1951	1	38333681	242147178	17215	Meat eicosapentaenoic acid content	203813497	BDH1	APOD
1	191753121	191755595	+	MSTRG.1974	1	38333681	242147178	17215	Meat eicosapentaenoic acid content	203813497	HES1	OPA1
1	197645444	197649981	+	MSTRG.2007	1	38333681	242147178	17215	Meat eicosapentaenoic acid content	203813497	LPP	BCL6
1	201860309	201863347	-	MSTRG.2084	1	38333681	242147178	17215	Meat eicosapentaenoic acid content	203813497	KLHL6	MCF2L2
1	234139854	234174258	+	MSTRG.2330	1	38333681	242147178	17215	Meat eicosapentaenoic acid content	203813497	SUCNR1	-
2	24695687	24702984	-	MSTRG.12030	2	2206513	206199220	17213	Meat arachidonic acid content	203992707	-	DIRAS2
2	28284789	28285642	+	MSTRG.12068	2	2206513	206199220	17213	Meat arachidonic acid content	203992707	-	SUSD3
2	28285007	28287691	-	MSTRG.12066	2	2206513	206199220	17213	Meat arachidonic acid content	203992707	-	SUSD3
2	28413206	28422151	-	MSTRG.12065	2	2206513	206199220	17213	Meat arachidonic acid content	203992707	FGD3	BICD2
2	35536143	35544644	-	MSTRG.12149	2	2206513	206199220	17213	Meat arachidonic acid content	203992707	RMI1	-
2	45575360	45584517	+	MSTRG.12292	2	2206513	206199220	17213	Meat arachidonic acid content	203992707	SLC18A1	LPL
2	50872169	50874061	-	MSTRG.12356	2	2206513	206199220	17213	Meat arachidonic acid content	203992707	-	FBXO10
2	51011215	51030788	+	MSTRG.12368	2	2206513	206199220	17213	Meat arachidonic acid content	203992707	GRHPR	ZCCHC7
2	63081253	63091004	+	MSTRG.12480	2	2206513	206199220	17213	Meat arachidonic acid content	203992707	ANXA1	-
2	70269526	70272080	-	MSTRG.12535	2	2206513	206199220	17213	Meat arachidonic acid content	203992707	SMARCA2	-
2	70660199	70689671	+	MSTRG.12541	2	2206513	206199220	17213	Meat arachidonic acid content	203992707	PUM3	-
2	73734140	73737034	+	MSTRG.12591	2	2206513	206199220	17213	Meat arachidonic acid content	203992707	KIAA2026	IL33
2	103713017	103715315	+	MSTRG.12769	2	2206513	206199220	17213	Meat arachidonic acid content	203992707	-	-
2	107636310	107637267	-	MSTRG.12790	2	2206513	206199220	17213	Meat arachidonic acid content	203992707	-	-
2	111817174	111820057	-	MSTRG.12819	2	2206513	206199220	17213	Meat arachidonic acid content	203992707	-	LGSN
2	117830552	117835673	-	MSTRG.12873	2	2206513	206199220	17213	Meat arachidonic acid content	203992707	-	HIBCH
2	118731308	118749563	+	MSTRG.12893	2	2206513	206199220	17213	Meat arachidonic acid content	203992707	SLC40A1	WDR75
2	124863888	125307423	-	MSTRG.12929	2	2206513	206199220	17213	Meat arachidonic acid content	203992707	-	-
2	131456189	131458851	-	MSTRG.12973	2	2206513	206199220	17213	Meat arachidonic acid content	203992707	-	AGPS
2	131634547	131635266	+	MSTRG.12977	2	2206513	206199220	17213	Meat arachidonic acid content	203992707	AGPS	NFE2L2
2	137273286	137273744	+	MSTRG.13035	2	2206513	206199220	17213	Meat arachidonic acid content	203992707	METTL8	TLK1
2	148098047	148102297	-	MSTRG.13090	2	2206513	206199220	17213	Meat arachidonic acid content	203992707	TANK	RBMS1
2	150886529	150929821	-	MSTRG.13110	2	2206513	206199220	17213	Meat arachidonic acid content	203992707	ACVR1	ACVR1C
2	164550169	164563977	+	MSTRG.13175	2	2206513	206199220	17213	Meat arachidonic acid content	203992707	ZEB2	GTDC1
2	183697901	183698415	-	MSTRG.13247	2	2206513	206199220	17213	Meat arachidonic acid content	203992707	-	TMEM37
1	63765146	63772080	-	MSTRG.696	1	43893827	249069867	17221	Meat polyunsaturated fatty acid content	205176040	-	LMO4
1	77644831	77657692	+	MSTRG.839	1	43893827	249069867	17221	Meat polyunsaturated fatty acid content	205176040	DPH5	S1PR1
1	90216383	90216945	+	MSTRG.972	1	43893827	249069867	17221	Meat polyunsaturated fatty acid content	205176040	PHTF1	RSBN1
1	103670488	103672016	-	MSTRG.1240	1	43893827	249069867	17221	Meat polyunsaturated fatty acid content	205176040	KCNN3	PMVK
1	105050875	105052615	-	MSTRG.1316	1	43893827	249069867	17221	Meat polyunsaturated fatty acid content	205176040	MEF2D	IQGAP3
1	112878952	112880838	-	MSTRG.1456	1	43893827	249069867	17221	Meat polyunsaturated fatty acid content	205176040	-	RGS5
1	122023890	122024368	-	MSTRG.1552	1	43893827	249069867	17221	Meat polyunsaturated fatty acid content	205176040	HUNK	SCAF4
1	154598497	154622329	+	MSTRG.1646	1	43893827	249069867	17221	Meat polyunsaturated fatty acid content	205176040	HTR1F	CGGBP1
1	182647359	182647931	-	MSTRG.1808	1	43893827	249069867	17221	Meat polyunsaturated fatty acid content	205176040	CD80	ADPRH
1	186108843	186113440	+	MSTRG.1877	1	43893827	249069867	17221	Meat polyunsaturated fatty acid content	205176040	ADCY5	HACD2
1	188856697	188857705	+	MSTRG.1914	1	43893827	249069867	17221	Meat polyunsaturated fatty acid content	205176040	-	-
1	190255340	190257907	+	MSTRG.1951	1	43893827	249069867	17221	Meat polyunsaturated fatty acid content	205176040	BDH1	APOD
1	191753121	191755595	+	MSTRG.1974	1	43893827	249069867	17221	Meat polyunsaturated fatty acid content	205176040	HES1	OPA1
1	197645444	197649981	+	MSTRG.2007	1	43893827	249069867	17221	Meat polyunsaturated fatty acid content	205176040	LPP	BCL6
1	201860309	201863347	-	MSTRG.2084	1	43893827	249069867	17221	Meat polyunsaturated fatty acid content	205176040	KLHL6	MCF2L2
1	234139854	234174258	+	MSTRG.2330	1	43893827	249069867	17221	Meat polyunsaturated fatty acid content	205176040	SUCNR1	-
1	40237930	40260632	-	MSTRG.578	1	38333681	249069867	17216	Meat docosapentaenoic acid content	210736186	JAK1	AK4
1	63765146	63772080	-	MSTRG.696	1	38333681	249069867	17216	Meat docosapentaenoic acid content	210736186	-	LMO4
1	77644831	77657692	+	MSTRG.839	1	38333681	249069867	17216	Meat docosapentaenoic acid content	210736186	DPH5	S1PR1
1	90216383	90216945	+	MSTRG.972	1	38333681	249069867	17216	Meat docosapentaenoic acid content	210736186	PHTF1	RSBN1
1	103670488	103672016	-	MSTRG.1240	1	38333681	249069867	17216	Meat docosapentaenoic acid content	210736186	KCNN3	PMVK
1	105050875	105052615	-	MSTRG.1316	1	38333681	249069867	17216	Meat docosapentaenoic acid content	210736186	MEF2D	IQGAP3
1	112878952	112880838	-	MSTRG.1456	1	38333681	249069867	17216	Meat docosapentaenoic acid content	210736186	-	RGS5
1	122023890	122024368	-	MSTRG.1552	1	38333681	249069867	17216	Meat docosapentaenoic acid content	210736186	HUNK	SCAF4
1	154598497	154622329	+	MSTRG.1646	1	38333681	249069867	17216	Meat docosapentaenoic acid content	210736186	HTR1F	CGGBP1
1	182647359	182647931	-	MSTRG.1808	1	38333681	249069867	17216	Meat docosapentaenoic acid content	210736186	CD80	ADPRH
1	186108843	186113440	+	MSTRG.1877	1	38333681	249069867	17216	Meat docosapentaenoic acid content	210736186	ADCY5	HACD2
1	188856697	188857705	+	MSTRG.1914	1	38333681	249069867	17216	Meat docosapentaenoic acid content	210736186	-	-
1	190255340	190257907	+	MSTRG.1951	1	38333681	249069867	17216	Meat docosapentaenoic acid content	210736186	BDH1	APOD
1	191753121	191755595	+	MSTRG.1974	1	38333681	249069867	17216	Meat docosapentaenoic acid content	210736186	HES1	OPA1
1	197645444	197649981	+	MSTRG.2007	1	38333681	249069867	17216	Meat docosapentaenoic acid content	210736186	LPP	BCL6
1	201860309	201863347	-	MSTRG.2084	1	38333681	249069867	17216	Meat docosapentaenoic acid content	210736186	KLHL6	MCF2L2
1	234139854	234174258	+	MSTRG.2330	1	38333681	249069867	17216	Meat docosapentaenoic acid content	210736186	SUCNR1	-
2	24695687	24702984	-	MSTRG.12030	2	6946243	234590826	17217	Meat docosapentaenoic acid content	227644583	-	DIRAS2
2	28284789	28285642	+	MSTRG.12068	2	6946243	234590826	17217	Meat docosapentaenoic acid content	227644583	-	SUSD3
2	28285007	28287691	-	MSTRG.12066	2	6946243	234590826	17217	Meat docosapentaenoic acid content	227644583	-	SUSD3
2	28413206	28422151	-	MSTRG.12065	2	6946243	234590826	17217	Meat docosapentaenoic acid content	227644583	FGD3	BICD2
2	35536143	35544644	-	MSTRG.12149	2	6946243	234590826	17217	Meat docosapentaenoic acid content	227644583	RMI1	-
2	45575360	45584517	+	MSTRG.12292	2	6946243	234590826	17217	Meat docosapentaenoic acid content	227644583	SLC18A1	LPL
2	50872169	50874061	-	MSTRG.12356	2	6946243	234590826	17217	Meat docosapentaenoic acid content	227644583	-	FBXO10
2	51011215	51030788	+	MSTRG.12368	2	6946243	234590826	17217	Meat docosapentaenoic acid content	227644583	GRHPR	ZCCHC7
2	63081253	63091004	+	MSTRG.12480	2	6946243	234590826	17217	Meat docosapentaenoic acid content	227644583	ANXA1	-
2	70269526	70272080	-	MSTRG.12535	2	6946243	234590826	17217	Meat docosapentaenoic acid content	227644583	SMARCA2	-
2	70660199	70689671	+	MSTRG.12541	2	6946243	234590826	17217	Meat docosapentaenoic acid content	227644583	PUM3	-
2	73734140	73737034	+	MSTRG.12591	2	6946243	234590826	17217	Meat docosapentaenoic acid content	227644583	KIAA2026	IL33
2	103713017	103715315	+	MSTRG.12769	2	6946243	234590826	17217	Meat docosapentaenoic acid content	227644583	-	-
2	107636310	107637267	-	MSTRG.12790	2	6946243	234590826	17217	Meat docosapentaenoic acid content	227644583	-	-
2	111817174	111820057	-	MSTRG.12819	2	6946243	234590826	17217	Meat docosapentaenoic acid content	227644583	-	LGSN
2	117830552	117835673	-	MSTRG.12873	2	6946243	234590826	17217	Meat docosapentaenoic acid content	227644583	-	HIBCH
2	118731308	118749563	+	MSTRG.12893	2	6946243	234590826	17217	Meat docosapentaenoic acid content	227644583	SLC40A1	WDR75
2	124863888	125307423	-	MSTRG.12929	2	6946243	234590826	17217	Meat docosapentaenoic acid content	227644583	-	-
2	131456189	131458851	-	MSTRG.12973	2	6946243	234590826	17217	Meat docosapentaenoic acid content	227644583	-	AGPS
2	131634547	131635266	+	MSTRG.12977	2	6946243	234590826	17217	Meat docosapentaenoic acid content	227644583	AGPS	NFE2L2
2	137273286	137273744	+	MSTRG.13035	2	6946243	234590826	17217	Meat docosapentaenoic acid content	227644583	METTL8	TLK1
2	148098047	148102297	-	MSTRG.13090	2	6946243	234590826	17217	Meat docosapentaenoic acid content	227644583	TANK	RBMS1
2	150886529	150929821	-	MSTRG.13110	2	6946243	234590826	17217	Meat docosapentaenoic acid content	227644583	ACVR1	ACVR1C
2	164550169	164563977	+	MSTRG.13175	2	6946243	234590826	17217	Meat docosapentaenoic acid content	227644583	ZEB2	GTDC1
2	183697901	183698415	-	MSTRG.13247	2	6946243	234590826	17217	Meat docosapentaenoic acid content	227644583	-	TMEM37
2	24695687	24702984	-	MSTRG.12030	2	6946243	238103316	17214	Meat eicosapentaenoic acid content	231157073	-	DIRAS2
2	24695687	24702984	-	MSTRG.12030	2	6946243	238103316	17210	Meat linolenic acid content	231157073	-	DIRAS2
2	28284789	28285642	+	MSTRG.12068	2	6946243	238103316	17214	Meat eicosapentaenoic acid content	231157073	-	SUSD3
2	28284789	28285642	+	MSTRG.12068	2	6946243	238103316	17210	Meat linolenic acid content	231157073	-	SUSD3
2	28285007	28287691	-	MSTRG.12066	2	6946243	238103316	17214	Meat eicosapentaenoic acid content	231157073	-	SUSD3
2	28285007	28287691	-	MSTRG.12066	2	6946243	238103316	17210	Meat linolenic acid content	231157073	-	SUSD3
2	28413206	28422151	-	MSTRG.12065	2	6946243	238103316	17214	Meat eicosapentaenoic acid content	231157073	FGD3	BICD2
2	28413206	28422151	-	MSTRG.12065	2	6946243	238103316	17210	Meat linolenic acid content	231157073	FGD3	BICD2
2	35536143	35544644	-	MSTRG.12149	2	6946243	238103316	17214	Meat eicosapentaenoic acid content	231157073	RMI1	-
2	35536143	35544644	-	MSTRG.12149	2	6946243	238103316	17210	Meat linolenic acid content	231157073	RMI1	-
2	45575360	45584517	+	MSTRG.12292	2	6946243	238103316	17214	Meat eicosapentaenoic acid content	231157073	SLC18A1	LPL
2	45575360	45584517	+	MSTRG.12292	2	6946243	238103316	17210	Meat linolenic acid content	231157073	SLC18A1	LPL
2	50872169	50874061	-	MSTRG.12356	2	6946243	238103316	17214	Meat eicosapentaenoic acid content	231157073	-	FBXO10
2	50872169	50874061	-	MSTRG.12356	2	6946243	238103316	17210	Meat linolenic acid content	231157073	-	FBXO10
2	51011215	51030788	+	MSTRG.12368	2	6946243	238103316	17214	Meat eicosapentaenoic acid content	231157073	GRHPR	ZCCHC7
2	51011215	51030788	+	MSTRG.12368	2	6946243	238103316	17210	Meat linolenic acid content	231157073	GRHPR	ZCCHC7
2	63081253	63091004	+	MSTRG.12480	2	6946243	238103316	17214	Meat eicosapentaenoic acid content	231157073	ANXA1	-
2	63081253	63091004	+	MSTRG.12480	2	6946243	238103316	17210	Meat linolenic acid content	231157073	ANXA1	-
2	70269526	70272080	-	MSTRG.12535	2	6946243	238103316	17214	Meat eicosapentaenoic acid content	231157073	SMARCA2	-
2	70269526	70272080	-	MSTRG.12535	2	6946243	238103316	17210	Meat linolenic acid content	231157073	SMARCA2	-
2	70660199	70689671	+	MSTRG.12541	2	6946243	238103316	17214	Meat eicosapentaenoic acid content	231157073	PUM3	-
2	70660199	70689671	+	MSTRG.12541	2	6946243	238103316	17210	Meat linolenic acid content	231157073	PUM3	-
2	73734140	73737034	+	MSTRG.12591	2	6946243	238103316	17214	Meat eicosapentaenoic acid content	231157073	KIAA2026	IL33
2	73734140	73737034	+	MSTRG.12591	2	6946243	238103316	17210	Meat linolenic acid content	231157073	KIAA2026	IL33
2	103713017	103715315	+	MSTRG.12769	2	6946243	238103316	17214	Meat eicosapentaenoic acid content	231157073	-	-
2	103713017	103715315	+	MSTRG.12769	2	6946243	238103316	17210	Meat linolenic acid content	231157073	-	-
2	107636310	107637267	-	MSTRG.12790	2	6946243	238103316	17214	Meat eicosapentaenoic acid content	231157073	-	-
2	107636310	107637267	-	MSTRG.12790	2	6946243	238103316	17210	Meat linolenic acid content	231157073	-	-
2	111817174	111820057	-	MSTRG.12819	2	6946243	238103316	17214	Meat eicosapentaenoic acid content	231157073	-	LGSN
2	111817174	111820057	-	MSTRG.12819	2	6946243	238103316	17210	Meat linolenic acid content	231157073	-	LGSN
2	117830552	117835673	-	MSTRG.12873	2	6946243	238103316	17214	Meat eicosapentaenoic acid content	231157073	-	HIBCH
2	117830552	117835673	-	MSTRG.12873	2	6946243	238103316	17210	Meat linolenic acid content	231157073	-	HIBCH
2	118731308	118749563	+	MSTRG.12893	2	6946243	238103316	17214	Meat eicosapentaenoic acid content	231157073	SLC40A1	WDR75
2	118731308	118749563	+	MSTRG.12893	2	6946243	238103316	17210	Meat linolenic acid content	231157073	SLC40A1	WDR75
2	124863888	125307423	-	MSTRG.12929	2	6946243	238103316	17214	Meat eicosapentaenoic acid content	231157073	-	-
2	124863888	125307423	-	MSTRG.12929	2	6946243	238103316	17210	Meat linolenic acid content	231157073	-	-
2	131456189	131458851	-	MSTRG.12973	2	6946243	238103316	17214	Meat eicosapentaenoic acid content	231157073	-	AGPS
2	131456189	131458851	-	MSTRG.12973	2	6946243	238103316	17210	Meat linolenic acid content	231157073	-	AGPS
2	131634547	131635266	+	MSTRG.12977	2	6946243	238103316	17214	Meat eicosapentaenoic acid content	231157073	AGPS	NFE2L2
2	131634547	131635266	+	MSTRG.12977	2	6946243	238103316	17210	Meat linolenic acid content	231157073	AGPS	NFE2L2
2	137273286	137273744	+	MSTRG.13035	2	6946243	238103316	17214	Meat eicosapentaenoic acid content	231157073	METTL8	TLK1
2	137273286	137273744	+	MSTRG.13035	2	6946243	238103316	17210	Meat linolenic acid content	231157073	METTL8	TLK1
2	148098047	148102297	-	MSTRG.13090	2	6946243	238103316	17214	Meat eicosapentaenoic acid content	231157073	TANK	RBMS1
2	148098047	148102297	-	MSTRG.13090	2	6946243	238103316	17210	Meat linolenic acid content	231157073	TANK	RBMS1
2	150886529	150929821	-	MSTRG.13110	2	6946243	238103316	17214	Meat eicosapentaenoic acid content	231157073	ACVR1	ACVR1C
2	150886529	150929821	-	MSTRG.13110	2	6946243	238103316	17210	Meat linolenic acid content	231157073	ACVR1	ACVR1C
2	164550169	164563977	+	MSTRG.13175	2	6946243	238103316	17214	Meat eicosapentaenoic acid content	231157073	ZEB2	GTDC1
2	164550169	164563977	+	MSTRG.13175	2	6946243	238103316	17210	Meat linolenic acid content	231157073	ZEB2	GTDC1
2	183697901	183698415	-	MSTRG.13247	2	6946243	238103316	17214	Meat eicosapentaenoic acid content	231157073	-	TMEM37
2	183697901	183698415	-	MSTRG.13247	2	6946243	238103316	17210	Meat linolenic acid content	231157073	-	TMEM37
2	237494455	237501076	+	MSTRG.13735	2	6946243	238103316	17214	Meat eicosapentaenoic acid content	231157073	EPB41	OPRD1
2	237494455	237501076	+	MSTRG.13735	2	6946243	238103316	17210	Meat linolenic acid content	231157073	EPB41	OPRD1
2	237787133	237789383	-	MSTRG.13754	2	6946243	238103316	17214	Meat eicosapentaenoic acid content	231157073	RCC1	PHACTR4
2	237787133	237789383	-	MSTRG.13754	2	6946243	238103316	17210	Meat linolenic acid content	231157073	RCC1	PHACTR4
1	25201287	25215676	+	MSTRG.412	1	10479903	266471112	14277	Carcass fat percentage	255991209	CDKN2C	C1orf185
1	35966475	35969475	+	MSTRG.530	1	10479903	266471112	14277	Carcass fat percentage	255991209	C1orf87	NFIA
1	40237930	40260632	-	MSTRG.578	1	10479903	266471112	14277	Carcass fat percentage	255991209	JAK1	AK4
1	63765146	63772080	-	MSTRG.696	1	10479903	266471112	14277	Carcass fat percentage	255991209	-	LMO4
1	77644831	77657692	+	MSTRG.839	1	10479903	266471112	14277	Carcass fat percentage	255991209	DPH5	S1PR1
1	90216383	90216945	+	MSTRG.972	1	10479903	266471112	14277	Carcass fat percentage	255991209	PHTF1	RSBN1
1	103670488	103672016	-	MSTRG.1240	1	10479903	266471112	14277	Carcass fat percentage	255991209	KCNN3	PMVK
1	105050875	105052615	-	MSTRG.1316	1	10479903	266471112	14277	Carcass fat percentage	255991209	MEF2D	IQGAP3
1	112878952	112880838	-	MSTRG.1456	1	10479903	266471112	14277	Carcass fat percentage	255991209	-	RGS5
1	122023890	122024368	-	MSTRG.1552	1	10479903	266471112	14277	Carcass fat percentage	255991209	HUNK	SCAF4
1	154598497	154622329	+	MSTRG.1646	1	10479903	266471112	14277	Carcass fat percentage	255991209	HTR1F	CGGBP1
1	182647359	182647931	-	MSTRG.1808	1	10479903	266471112	14277	Carcass fat percentage	255991209	CD80	ADPRH
1	186108843	186113440	+	MSTRG.1877	1	10479903	266471112	14277	Carcass fat percentage	255991209	ADCY5	HACD2
1	188856697	188857705	+	MSTRG.1914	1	10479903	266471112	14277	Carcass fat percentage	255991209	-	-
1	190255340	190257907	+	MSTRG.1951	1	10479903	266471112	14277	Carcass fat percentage	255991209	BDH1	APOD
1	191753121	191755595	+	MSTRG.1974	1	10479903	266471112	14277	Carcass fat percentage	255991209	HES1	OPA1
1	197645444	197649981	+	MSTRG.2007	1	10479903	266471112	14277	Carcass fat percentage	255991209	LPP	BCL6
1	201860309	201863347	-	MSTRG.2084	1	10479903	266471112	14277	Carcass fat percentage	255991209	KLHL6	MCF2L2
1	234139854	234174258	+	MSTRG.2330	1	10479903	266471112	14277	Carcass fat percentage	255991209	SUCNR1	-
1	261239485	261241132	+	MSTRG.2543	1	10479903	266471112	14277	Carcass fat percentage	255991209	NDUFV3	PKNOX1

## Sheet: ilncRNAs
Supplementary File S8. Results of QTL analysis.
Chr	St	End	Strand	lincRNA	Chr	St_QTL	End_QTL	QTL_ID	Type	QTL interval	Parental Gene
10	28848713	28850535	+	MSTRG.2931	10	26820350	32294189	126989	Tail fat deposition	5473839	N4BP2L1
13	76460528	76463451	+	MSTRG.6608	13	75498647	81506987	95833	Total fat area	6008340	PREX1
21	28566751	28571066	-	MSTRG.15041	21	8498873	50073674	17201	Meat myristic acid content	41574801	CDON
21	28566751	28571066	-	MSTRG.15041	21	4519511	49999253	17212	Meat arachidonic acid content	45479742	CDON
21	28566751	28571066	-	MSTRG.15041	21	4519511	50073674	17218	Meat docosapentaenoic acid content	45554163	CDON
21	28566751	28571066	-	MSTRG.15041	21	4519511	50073674	17207	Meat gadoleic acid content	45554163	CDON
21	28566751	28571066	-	MSTRG.15041	21	4519511	50073674	17202	Meat palmitic acid content	45554163	CDON
21	28566751	28571066	-	MSTRG.15041	21	4519511	50073674	17211	Meat linolenic acid content	45554163	CDON
21	28566751	28571066	-	MSTRG.15041	21	4519511	50073674	17203	Meat stearic acid content	45554163	CDON
21	28566751	28571066	-	MSTRG.15041	21	4519511	50073674	17205	Meat oleic acid content	45554163	CDON
21	28566751	28571066	-	MSTRG.15041	21	4519511	50073674	17206	Meat cis-vaccenic acid content	45554163	CDON
21	28566751	28571066	-	MSTRG.15041	21	4519511	50073674	17209	Meat linoleic acid content	45554163	CDON
18	15552761	15554219	-	MSTRG.10374	18	10964106	62018008	17208	Meat gadoleic acid content	51053902	AKAP13
18	15552761	15554219	-	MSTRG.10374	18	12038572	63092474	17219	Meat docosahexaenoic acid content	51053902	AKAP13
16	18230152	18234163	+	MSTRG.9122	16	4469249	60232331	14308	Subcutaneous fat area	55763082	SMIM15
16	18230152	18234163	+	MSTRG.9122	16	4469249	62748762	14309	Subcutaneous fat thickness	58279513	SMIM15
10	28848713	28850535	+	MSTRG.2931	10	13900918	78598103	14294	Carcass fat percentage	64697185	N4BP2L1
1	96897441	96897712	-	MSTRG.1054	1	78279499	143728559	14239	Backfat at third lumbar	65449060	PDE4DIP
1	96924561	96928508	-	MSTRG.1055	1	78279499	143728559	14239	Backfat at third lumbar	65449060	PDE4DIP
5	16123041	16133291	-	MSTRG.22487	5	2630671	91363350	17204	Meat palmitoleic acid content	88732679	LONP1
5	31966950	31968413	+	MSTRG.22684	5	2630671	91363350	17204	Meat palmitoleic acid content	88732679	TNFAIP8
3	128381121	128382102	+	MSTRG.19616	3	49221453	156721993	17220	Meat conjugated linoleic acid content	107500540	BTG1
1	96897441	96897712	-	MSTRG.1054	1	38333681	242147178	17215	Meat eicosapentaenoic acid content	203813497	PDE4DIP
1	96924561	96928508	-	MSTRG.1055	1	38333681	242147178	17215	Meat eicosapentaenoic acid content	203813497	PDE4DIP
1	224424906	224426789	-	MSTRG.2234	1	38333681	242147178	17215	Meat eicosapentaenoic acid content	203813497	B3GALNT1
2	10964632	10965165	+	MSTRG.11939	2	2206513	206199220	17213	Meat arachidonic acid content	203992707	KIAA1958
2	93288741	93289819	+	MSTRG.12695	2	2206513	206199220	17213	Meat arachidonic acid content	203992707	ENSOARG00000008914
1	96897441	96897712	-	MSTRG.1054	1	43893827	249069867	17221	Meat polyunsaturated fatty acid content	205176040	PDE4DIP
1	96924561	96928508	-	MSTRG.1055	1	43893827	249069867	17221	Meat polyunsaturated fatty acid content	205176040	PDE4DIP
1	224424906	224426789	-	MSTRG.2234	1	43893827	249069867	17221	Meat polyunsaturated fatty acid content	205176040	B3GALNT1
1	96897441	96897712	-	MSTRG.1054	1	38333681	249069867	17216	Meat docosapentaenoic acid content	210736186	PDE4DIP
1	96924561	96928508	-	MSTRG.1055	1	38333681	249069867	17216	Meat docosapentaenoic acid content	210736186	PDE4DIP
1	224424906	224426789	-	MSTRG.2234	1	38333681	249069867	17216	Meat docosapentaenoic acid content	210736186	B3GALNT1
2	10964632	10965165	+	MSTRG.11939	2	6946243	234590826	17217	Meat docosapentaenoic acid content	227644583	KIAA1958
2	93288741	93289819	+	MSTRG.12695	2	6946243	234590826	17217	Meat docosapentaenoic acid content	227644583	ENSOARG00000008914
2	10964632	10965165	+	MSTRG.11939	2	6946243	238103316	17214	Meat eicosapentaenoic acid content	231157073	KIAA1958
2	10964632	10965165	+	MSTRG.11939	2	6946243	238103316	17210	Meat linolenic acid content	231157073	KIAA1958
2	93288741	93289819	+	MSTRG.12695	2	6946243	238103316	17214	Meat eicosapentaenoic acid content	231157073	ENSOARG00000008914
2	93288741	93289819	+	MSTRG.12695	2	6946243	238103316	17210	Meat linolenic acid content	231157073	ENSOARG00000008914
1	10955317	10964816	+	MSTRG.196	1	10479903	266471112	14277	Carcass fat percentage	255991209	ENSOARG00000000604
1	19084353	19087574	-	MSTRG.332	1	10479903	266471112	14277	Carcass fat percentage	255991209	ENSOARG00000000941
1	96897441	96897712	-	MSTRG.1054	1	10479903	266471112	14277	Carcass fat percentage	255991209	PDE4DIP
1	96924561	96928508	-	MSTRG.1055	1	10479903	266471112	14277	Carcass fat percentage	255991209	PDE4DIP
1	224424906	224426789	-	MSTRG.2234	1	10479903	266471112	14277	Carcass fat percentage	255991209	B3GALNT1
1	250372365	250376460	+	MSTRG.2456	1	10479903	266471112	14277	Carcass fat percentage	255991209	NCK1
